# Supplementary material
Source: PubMed Central journal article supplement (PMC6072570)
Supplement: NIHMS965514-supplement-1.pdf [file NIHMS965514-supplement-1.pdf]

**Supplementary Table 1. HaploReg 4.1 annotation of 11 SNPs within the *CD40* locus**

| SNPs in <i>CD40</i> locus | Promoter Histone Marks | Enhancer Histone Marks | DNase | Proteins bound | Motifs changed | Score |
|---------------------------|------------------------|------------------------|-------|----------------|----------------|-------|
| rs6074022                 | 1                      | 1                      | 1     | 1              | 1              | 5     |
| rs1883832                 | 1                      | 1                      | 1     | 1              | 1              | 5     |
| rs4810485                 | 1                      | 1                      | 1     | 1              | 1              | 5     |
| rs6032664                 | 1                      | 1                      |       |                | 1              | 3     |
| rs1569723                 |                        | 1                      | 1     |                | 1              | 3     |
| rs4239702                 | 1                      | 1                      |       |                | 1              | 3     |
| rs6065926                 |                        | 1                      |       |                | 1              | 2     |
| rs6032660                 |                        |                        |       |                | 1              | 1     |
| rs2024568                 |                        |                        |       |                | 1              | 1     |
| rs6032662                 |                        |                        |       |                | 1              | 1     |
| rs6032663                 |                        |                        |       |                | 1              | 1     |

Confirmed fSNPs identified by SNP-seq highlighted in red.

**Supplementary Table S2. Mass spectrometry for CD40 FREP**

|        | rs4810485 | non-specific |
|--------|-----------|--------------|
| RBPJ   | 4         | 0            |
|        |           |              |
|        | rs6032664 | non-specific |
| RSRC2  | 7         | 0            |
| F5GX09 | 2         | 0            |
| E7EQU1 | 2         | 0            |
| E9PKZ0 | 2         | 0            |
| RS9    | 2         | 0            |
| RU1C   | 2         | 0            |
| H3BM89 | 2         | 0            |
| J3QRC4 | 2         | 0            |
|        |           |              |
|        | rs6065926 | non-specific |
| FUBP1  | 5         | 0            |
| TR150  | 5         | 0            |
| MYPT1  | 3         | 0            |
| ENL    | 3         | 0            |
| FILA2  | 2         | 0            |
| A2A2V2 | 2         | 0            |
| EXOS9  | 2         | 0            |
| ZN638  | 2         | 0            |
| MOROK9 | 2         | 0            |
| HOYMA0 | 2         | 0            |
| PININ  | 2         | 0            |
| ETV6   | 2         | 0            |
| PPIL1  | 2         | 0            |
| UBP22  | 2         | 0            |
| FIP1   | 2         | 0            |

**Supplementary Table 3. 148 candidate fSNPs in juvenile idiopathic arthritis**

| <i>Locus</i>       | <i>SNP</i>         | <i>Locus</i>         | <i>SNP</i>         |
|--------------------|--------------------|----------------------|--------------------|
| <i>ANKRD55</i>     | <i>rs71624119</i>  | <i>IL2RB</i>         | <i>rs228957</i>    |
| <i>ATP8B2/IL6R</i> | <i>rs8089151</i>   |                      | <i>rs228960</i>    |
|                    | <i>rs4891036</i>   | <i>IL6</i>           | <i>rs12700391</i>  |
|                    | <i>rs2481065</i>   |                      | <i>rs1581497</i>   |
|                    | <i>rs12033701</i>  |                      | <i>rs1829927</i>   |
| <i>C3ORF1/CD80</i> | <i>rs4688002</i>   |                      | <i>rs12537614</i>  |
|                    | <i>rs4687854</i>   |                      | <i>rs13311155</i>  |
|                    | <i>rs62263399</i>  |                      | <i>rs13311199</i>  |
|                    | <i>rs62263404</i>  |                      | <i>rs7808457</i>   |
|                    | <i>rs2276713</i>   |                      | <i>rs4722169</i>   |
|                    | <i>rs3732418</i>   |                      | <i>rs56061963</i>  |
|                    | <i>rs59024323</i>  |                      | <i>rs35658589</i>  |
|                    | <i>rs11720158</i>  |                      | <i>rs28572733</i>  |
|                    | <i>rs1599796</i>   | <i>JAZF1</i>         | <i>rs7786444</i>   |
| <i>CCR1/CCR3</i>   | <i>rs79893749</i>  |                      | <i>rs10280937</i>  |
|                    | <i>rs58697594</i>  |                      | <i>rs7796417</i>   |
|                    | <i>rs73833032</i>  |                      | <i>rs10263857</i>  |
|                    | <i>rs74433128</i>  |                      | <i>rs73300665</i>  |
|                    | <i>rs76733709</i>  |                      | <i>rs740261</i>    |
|                    | <i>rs145617407</i> |                      | <i>rs10272155</i>  |
| <i>CHR13Q14</i>    | <i>rs12876545</i>  | <i>LTBR</i>          | <i>rs12354</i>     |
|                    | <i>rs9533127</i>   |                      | <i>rs9669611</i>   |
|                    | <i>rs9533129</i>   | <i>PRM1/C16ORF75</i> | <i>rs35342456</i>  |
| <i>COG6</i>        | <i>rs144565908</i> |                      | <i>rs12927773</i>  |
|                    | <i>rs9603612</i>   |                      | <i>rs1345880</i>   |
|                    | <i>rs12875311</i>  |                      | <i>rs55752638</i>  |
|                    | <i>rs12876235</i>  |                      | <i>rs140470930</i> |
|                    | <i>rs9532433</i>   |                      | <i>rs12917839</i>  |
|                    | <i>rs9548932</i>   |                      | <i>rs12922090</i>  |
|                    | <i>rs9532434</i>   | <i>PRR5L</i>         | <i>rs2218565</i>   |
|                    |                    |                      | <i>rs10768207</i>  |
| <i>ERAP2/LNPEP</i> | <i>rs2549783</i>   |                      | <i>rs3824946</i>   |
|                    | <i>rs2927609</i>   |                      | <i>rs11033552</i>  |
|                    | <i>rs2910686</i>   |                      | <i>rs4755450</i>   |
|                    | <i>rs1363908</i>   |                      | <i>rs10836538</i>  |
|                    | <i>rs1216571</i>   |                      | <i>rs191318</i>    |
|                    | <i>rs1216566</i>   | <i>PTPN2</i>         | <i>rs888270</i>    |

|                          |                    |                |                    |
|--------------------------|--------------------|----------------|--------------------|
|                          | <i>rs2617435</i>   |                | <i>rs2847260</i>   |
|                          | <i>rs1423566</i>   |                | <i>rs2847278</i>   |
|                          | <i>rs2617439</i>   |                | <i>rs2542149</i>   |
|                          | <i>rs2432142</i>   |                | <i>rs11663253</i>  |
|                          | <i>rs2910792</i>   |                | <i>rs45450798</i>  |
|                          | <i>rs2910789</i>   |                | <i>rs8096138</i>   |
|                          | <i>rs7726445</i>   | <i>PTPN22</i>  | <i>rs2476601</i>   |
|                          | <i>rs7716222</i>   | <i>RUNX1</i>   | <i>rs8133843</i>   |
|                          | <i>rs10044354</i>  | <i>RUNX3</i>   | <i>rs4648881</i>   |
|                          | <i>rs38042</i>     |                | <i>rs6686594</i>   |
|                          | <i>rs38043</i>     | <i>SH2B3</i>   | <i>rs3184504</i>   |
|                          | <i>rs38044</i>     | <i>STAT4</i>   | <i>rs11889341</i>  |
|                          | <i>rs27307</i>     |                | <i>rs4853459</i>   |
|                          | <i>rs27659</i>     |                | <i>rs8179673</i>   |
|                          | <i>rs31398</i>     |                | <i>rs10181656</i>  |
|                          | <i>rs27295</i>     | <i>TYK2</i>    | <i>rs144309607</i> |
|                          | <i>rs27747</i>     | <i>UBE2L3</i>  | <i>rs5998509</i>   |
| <i>FAS</i>               | <i>rs2148287</i>   |                | <i>rs131660</i>    |
|                          | <i>rs1926192</i>   |                | <i>rs59391722</i>  |
|                          | <i>rs7069750</i>   |                | <i>rs131665</i>    |
|                          | <i>rs9658742</i>   |                | <i>rs2266959</i>   |
| <i>HLA-DQB1/HLS-DQA2</i> | <i>rs111335405</i> |                | <i>rs181360</i>    |
|                          | <i>rs112117693</i> |                | <i>rs5749485</i>   |
|                          | <i>rs17427494</i>  |                | <i>rs73166622</i>  |
|                          | <i>rs112608098</i> |                | <i>rs5749495</i>   |
|                          | <i>rs2935907</i>   |                | <i>rs5754238</i>   |
|                          | <i>rs36030018</i>  |                | <i>rs5998619</i>   |
| <i>IL2/IL21</i>          | <i>rs13108723</i>  |                | <i>rs73166632</i>  |
|                          | <i>rs11575812</i>  |                | <i>rs2070512</i>   |
|                          | <i>rs2069776</i>   |                | <i>rs5754295</i>   |
|                          | <i>rs35077420</i>  |                | <i>rs11089629</i>  |
|                          | <i>rs1383048</i>   |                | <i>rs5754344</i>   |
|                          | <i>rs34880409</i>  |                | <i>rs4821116</i>   |
|                          | <i>rs11736927</i>  |                | <i>rs7444</i>      |
|                          | <i>rs4833830</i>   |                | <i>rs1811069</i>   |
|                          | <i>rs6814718</i>   | <i>ZFP36L1</i> | <i>rs12434551</i>  |
|                          | <i>rs13122213</i>  |                |                    |
|                          | <i>rs13101493</i>  |                |                    |
|                          | <i>rs9996350</i>   |                |                    |

**Supplementary Table 4. HaploReg 4.1 annotation of 11 SNPs within the *STAT4* locus**

| SNPs in <i>STAT4</i> locus | Promoter Histone Marks | Enhancer Histone Marks | DNase    | Proteins bound | Motifs changed | Score    |
|----------------------------|------------------------|------------------------|----------|----------------|----------------|----------|
| rs11889341                 | 1                      | 1                      |          |                | 1              | 3        |
| rs7582694                  |                        | 1                      | 1        | 1              |                | 3        |
| rs4274624                  |                        | 1                      | 1        |                |                | 2        |
| rs7574865                  |                        | 1                      |          |                | 1              | 2        |
| <b>rs8179673</b>           |                        | <b>1</b>               |          |                | <b>1</b>       | <b>2</b> |
| <b>rs10181656</b>          |                        |                        | <b>1</b> |                | <b>1</b>       | <b>2</b> |
| rs4853458                  |                        |                        |          |                | 1              | 1        |
| rs139605600                |                        |                        |          |                | 1              | 1        |
| rs4853459                  |                        |                        |          |                | 1              | 1        |
| rs7568275                  |                        |                        |          |                | 1              | 1        |
| rs10174238                 |                        |                        |          |                | 1              | 1        |

Confirmed fSNPs identified by SNP-seq highlighted in red.

**Supplementary Table 5. Mass spectrometry for STAT4 FREP**

|            | Rs10181656 | non-specific |
|------------|------------|--------------|
| H1.2       | 73         | 0            |
| DREB       | 3          | 0            |
| E7EP32     | 2          | 0            |
| BCLF1      | 2          | 0            |
|            |            |              |
|            | Rs8179673  | non-specific |
| SATB2      | 102        | 0            |
| SATB1      | 48         | 0            |
| A0A0A0MS59 | 10         | 0            |
| PRP4B      | 8          | 0            |
| TYB4       | 8          | 0            |
| PDS5A      | 8          | 0            |
| CHD4       | 7          | 0            |
| MOQZG7     | 6          | 0            |
| NSD3       | 5          | 0            |
| C9JFR7     | 5          | 0            |
| HDGR2      | 5          | 0            |
| A8MXP9     | 4          | 0            |
| CDC5L      | 4          | 0            |
| NOP58      | 4          | 0            |
| H0Y3Z3     | 4          | 0            |
| SF3B1      | 4          | 0            |
| MEF2D      | 4          | 0            |
| RIF1       | 4          | 0            |
| SFR15      | 4          | 0            |
| SFSWA      | 4          | 0            |
| H2AY       | 3          | 0            |
| FUS        | 3          | 0            |
| RBM28      | 3          | 0            |
| BCOR       | 3          | 0            |
| MTA2       | 3          | 0            |
| G3V220     | 3          | 0            |
| THYN1      | 3          | 0            |
| E9PKP7     | 2          | 0            |
| PHF5A      | 2          | 0            |
| A0A0A0MSIO | 2          | 0            |
| SREK1      | 2          | 0            |

|        |   |   |
|--------|---|---|
| RPRD2  | 2 | 0 |
| ZN609  | 2 | 0 |
| SRP09  | 2 | 0 |
| DNLI3  | 2 | 0 |
| SF3A1  | 2 | 0 |
| D6RAT0 | 2 | 0 |
| SYTL4  | 1 | 0 |

## Supplementary Table 6. Primers used in this paper

|                                           |                                 |                                                                                                                                             |
|-------------------------------------------|---------------------------------|---------------------------------------------------------------------------------------------------------------------------------------------|
| <b>SNP-seq for JIA library</b>            | G5                              | /biosg/TCC AGT CAG GTG TGA TGC TC                                                                                                           |
|                                           | G3                              | CGA GCT TAT CGT CGT CAT CC                                                                                                                  |
|                                           | SNP-seq oligonucleotide for HTP | TCC AGT CAG GTG TGA TGC TCTGC TCG GGG ATC CAG GAA TTC ATC TGG AG<br>XXXXXXXXXXXXXXXXXXXXXXXXXXXXXXXXXXCT CCA GGG ATG ACG ACG ATA AGC<br>TCG |
|                                           | SNP-seq for CD40 SNPs           |                                                                                                                                             |
|                                           | 2Brs6032660                     | TCC AGT CAG GTG TGA TGC TCC TGG AGC GTG CCG TTG CAC TCC GGC CTG<br>GGT AAC AAG AGC TCC AGG GAT GAC GAC GAT AAG CTC G                        |
|                                           | 2Brs2024568                     | TCC AGT CAG GTG TGA TGC TCC TGG AGA TGC CCA GGC TGG TCT CGA ACT<br>CCT GAG CTC AAC TCC AGG GAT GAC GAC GAT AAG CTC G                        |
|                                           | 2Brs6032662                     | TCC AGT CAG GTG TGA TGC TCC TGG AGA GGC CAG ATA ATG GGA CGT GAG<br>GAG ATG TTT CCC TCC AGG GAT GAC GAC GAT AAG CTC G                        |
|                                           | 2Brs6032663                     | TCC AGT CAG GTG TGA TGC TCC TGG AGA AAA TTA GCC AGG CAT GGT GGT<br>GCG CGC CTG TAC TCC AGG GAT GAC GAC GAT AAG CTC G                        |
|                                           | 2Brs6065926                     | TCC AGT CAG GTG TGA TGC TCC TGG AGA ATA CAT GGG TAG GAA GTT CTG<br>TGT TGG CTC ATC TCC AGG GAT GAC GAC GAT AAG CTC G                        |
|                                           | 2Brs6032664                     | TCC AGT CAG GTG TGA TGC TCC TGG AGA CAG AAT TGT ATC TCT TGA TCC<br>TGA TTC TCA AAC TCC AGG GAT GAC GAC GAT AAG CTC G                        |
|                                           | 2Brs6074022                     | TCC AGT CAG GTG TGA TGC TCC TGG AGG TGC TGA GTG TCC TCA CGA CAT<br>GGC AGA CAG CTC TCC AGG GAT GAC GAC GAT AAG CTC G                        |
|                                           | 2Brs1569723                     | TCC AGT CAG GTG TGA TGC TCC TGG AGC TTT ACA CCC ACA GCC CAA AAT<br>TCC AAT TTC CTC TCC AGG GAT GAC GAC GAT AAG CTC G                        |
|                                           | 2Brs1883832                     | TCC AGT CAG GTG TGA TGC TCC TGG AGC CTG GTC TCA CCT CGC CAT GGT<br>TCG TCT GCC TCC TCC AGG GAT GAC GAC GAT AAG CTC G                        |
|                                           | 2Brs4810485                     | TCC AGT CAG GTG TGA TGC TCC TGG AGG AGG GCT GTA GAT TCC GGC CTG<br>AAG CCT GGG CAC TCC AGG GAT GAC GAC GAT AAG CTC G                        |
|                                           | 2Brs4239702                     | TCC AGT CAG GTG TGA TGC TCC TGG AGT CTT TTA AAA CAA AAA CCA AGA<br>GCA GGC CTG GGC TCC AGG GAT GAC GAC GAT AAG CTC G                        |
| <b>Next generation sequencing library</b> | L1                              | ACACTCTTTCCCTACACGACTCCAGTCAGGTGTGATGCTC                                                                                                    |
|                                           | L2                              | AATGATACGGCGACCACCGAGATCTACACTCTTTCCCTACACGACTCCAGT                                                                                         |
|                                           | R1                              | GTGACTGGAGTTCAGACGTGTGCTCTTCCGATCCGAGCTTATCGTCGTCAATCC                                                                                      |
|                                           | R2                              | CAAGCAGAAGACGGCATACGAGATXXXXXXXXGTGACTGGAGTTCAGACGTGT                                                                                       |
|                                           | Index sp                        | GATCGGAAGAGCACACGTCTGAACTCCAGTCAC                                                                                                           |
|                                           | CSP                             | TGC TCG GGG ATC CAG GAA TTC ATC TGG AG                                                                                                      |
| <b>CRISPR/Cas9</b>                        | 485CRISPR/F                     | CAC CGT TCC TGC CCA GGC TTC AGG C                                                                                                           |
|                                           | 485CRISPR/R                     | AAA CGC CTG AAG CCT GGG CAG GAA C                                                                                                           |
|                                           | 664CRISPR/F                     | CAC CGA AAA AAG CAC TTT GAG AAT C                                                                                                           |
|                                           | 664CRISPR/R                     | AAA CGA TTC TCA AAG TGC TTT TTT C                                                                                                           |
|                                           | 926CRISPR/F                     | CAC CGA TGG GTA GGA AGT TCT GTG T                                                                                                           |
|                                           | 936CRISPR/R                     | AAA CAC ACA GAA CTT CCT ACC CAT C                                                                                                           |
|                                           | rs8179673CRISPR/F               | CACCGAATAAGTATATATTAATAA                                                                                                                    |
|                                           | rs8179673CRISPR/R               | AAACTTATTTAATATATACTTATTC                                                                                                                   |
|                                           | rs10181656CRISPR/F              | CACCGAAAGGAGGGTAGTGGTACAA                                                                                                                   |
|                                           | rs10181656CRISPR/R              | AAACTTGTAACACTACCCTCCTTC                                                                                                                    |
| <b>make homologous sequence</b>           | 485FWD set 1                    | AACAAGAGATGGGTGCAGAG                                                                                                                        |



|                                        |                           |                                                                                                                          |
|----------------------------------------|---------------------------|--------------------------------------------------------------------------------------------------------------------------|
| <b>FOR CD40<br/>CRISPR/CAS9</b>        |                           |                                                                                                                          |
|                                        | 485REV set 1              | TCACAACCAGGTTCTTCCATTA                                                                                                   |
|                                        | 664FWD set 2              | GGGAGAGAGGTGTAAAGATAGATAAAG                                                                                              |
|                                        | 664REV set 2              | CACCTCCTTCGAGGTTCAAAGT                                                                                                   |
|                                        | 926FWD set 1              | CAGAGCGAGATTCCATCTCAAA                                                                                                   |
|                                        | 926REV set 1              | CAGTCTCTTCTTACCTCCAGTCT                                                                                                  |
| <b>outside<br/>homologous<br/>seq.</b> | 485FWD1-1                 | CTGCCTTCTTCCAGGGCATCTTG                                                                                                  |
|                                        | 664FWD1-1                 | GACAGATATTTATCAGGCTATTATG                                                                                                |
|                                        | 926FWD1-1                 | CATGCCACTACACTCCAGCCTG                                                                                                   |
|                                        |                           |                                                                                                                          |
| <b>FREP</b>                            | FREPbio485G/F             | /5Biosg/AAT GAT ACG GCG ACC ACC GAG GAT CCG TGG CTG CTG CAG AAC<br>GGG GGG TGC TGG TGA ATT CTC GTA TGC CGT CTT CTG CTT G |
|                                        | FREPbio664T/F             | /5Biosg/AAT GAT ACG GCG ACC ACC GAG GAT CCA GAA TTG TAT CTC TTG<br>ATC CTG ATT CTC AGA ATT CTC GTA TGC CGT CTT CTG CTT G |
|                                        | FREPbio926G/F             | /5Biosg/AAT GAT ACG GCG ACC ACC GAG GAT CCA TAC ATG GGT AGG AAG<br>TTC TGT GTT GGC TGA ATT CTC GTA TGC CGT CTT CTG CTT G |
|                                        | FREPbiors8179673T/F       | /5Biosg/AAT GAT ACG GCG ACC ACC GAG GAT<br>CCTAAGTATATATTAAATAAAGGTCCATAACCAGA ATT CTC GTA TGC CGT CTT CTG<br>CTT G      |
|                                        | FREPbioRS10181656G/F      | /5Biosg/AAT GAT ACG GCG ACC ACC GAG GAT<br>CCATCCAACCTCTTCTCAGCCCTTGTAACACTACGA ATT CTC GTA TGC CGT CTT CTG<br>CTT G     |
| <b>3C</b>                              | Primers for first<br>PCR  |                                                                                                                          |
|                                        | 3c664fwd                  | atggccaggtcagcagcctc                                                                                                     |
|                                        | 3c664rev                  | ggatgaagagagagatctctttg                                                                                                  |
|                                        | 3c926fwd                  | cctgaaagcataatgactacaatc                                                                                                 |
|                                        | 3c926rev                  | agctgagctgctgactctgaca                                                                                                   |
|                                        | 3c485fwd                  | tgctcactgtcagaatgtctctgg                                                                                                 |
|                                        | 3c485rev                  | ttaagggcacatttgcaagtcttg                                                                                                 |
|                                        | Primers for nested<br>PCR |                                                                                                                          |
|                                        | 3C664N/F                  | GCAGCCTCTTGAGGTCACAG                                                                                                     |
|                                        | 3C664N/R                  | ATTTACATTTCTCAATTATTAGGG                                                                                                 |
|                                        | 3C926N/F                  | TGACTACAATCTACCAGAGCAG                                                                                                   |
|                                        | 3C926N/R                  | GAGTTACATTCTATTTATATACCCC                                                                                                |
|                                        | 3C485N/F                  | CCCTCTTACCAGGTAAACTC                                                                                                     |
|                                        | 3C485N/R                  | AAGTCTTGTGGATTCTGCCTC                                                                                                    |
| <b>ChIP</b>                            | 40ChIP194-220             | CCC AAG TAC CTG GCT CCT TCA TCC CAG                                                                                      |
|                                        | 40ChIP276-303             | GCT TTC CTT GAT ACC ATG GGT CAT TCC                                                                                      |
|                                        | 664 FWD Set 1             | CTC GAT TAC TCA CTG GGC TAT G                                                                                            |
|                                        | 664 REV Set 1             | AGA ACC AGA GAG GGC AGA TA                                                                                               |
|                                        | 926 FWD Set 1             | GGG AAT GTC TTT ATG GAT GTG AAA T                                                                                        |
|                                        | 926 REV Set 1             | CAC GAG ACT ACT TTG ATC CTT ACC                                                                                          |

|                                |                 |                                                          |
|--------------------------------|-----------------|----------------------------------------------------------|
| <b>Real Time PCR for STAT4</b> | STAT4 FWD set 1 | AAGCCTTCGGTAACACTACAG                                    |
|                                | STAT4 RWD set 1 | TCACTTCGGATTGTTGAGATGG                                   |
|                                | SATB2 FWD set 2 | GAAGTTGCTGCCAGTTAAAG                                     |
|                                | SATB2 RWD set 2 | AGAGGAAGCCCAAAGTGAAG                                     |
|                                | H1.2 FWD set 2  | AAGAAGAAGCGGCCAAA                                        |
|                                | H1.2 RWD set 2  | GAAACTCCGCTACGCTCTTTA                                    |
| <b>shRNA knockdown</b>         | FUBP1 (2264)    | AAAAGgatgcagacgacttgatgTTGGATCCAAtcaagtcgtctgcatcc       |
|                                | RSRC2 (1550)    | AAAAGCTTGCATGGGTGTTGCATTGTTGGATCCAACAATGCAACACCCATGCAAGC |
|                                | THRAP3 (3651)   | AAAAGGACCAAAGTCTGGATCTGGATCCAAGatccaagcagtttggtcc        |
|                                | RBPJ (2057)     | AAAAGgctggaatacaagttgaaTTGGATCCAAttcaactgtattccagcc      |

**Supplementary Table 7. Antibodies used in this paper**

| <b>Antibody (clone)</b> | <b>Manufacturer</b> | <b>Cat#</b>   | <b>Usage</b>                 | <b>Lot number</b> | <b>Website for validation and dilution</b>                                                                                                                                                              |
|-------------------------|---------------------|---------------|------------------------------|-------------------|---------------------------------------------------------------------------------------------------------------------------------------------------------------------------------------------------------|
| FUBP1                   | GENETEX             | GTX104579     | WB, ChIP, EMSA-SUPERSHIFTING | 40912             | <a href="http://www.genetex.com/FUBP1-antibody-GTX104579.html">http://www.genetex.com/FUBP1-antibody-GTX104579.html</a>                                                                                 |
| CD40 (H-10)             | SANTA CRUZ          | sc-13128      | WB                           | G1613             | <a href="https://www.scbt.com/scbt/product/cd40-antibody-h-10">https://www.scbt.com/scbt/product/cd40-antibody-h-10</a>                                                                                 |
| TRAP150                 | PROTEINTECH         | 19744-1-AP    | WB, EMSA-SUPERSHIFTING       | 11887             | <a href="https://www.ptglab.com/results?q=19744-1-ap">https://www.ptglab.com/results?q=19744-1-ap</a>                                                                                                   |
| TRAP150 (N-18)          | SANTA CRUZ          | sc-5378       | WB, EMSA-SUPERSHIFTING       | E1706             | <a href="https://www.scbt.com/scbt/product/trap150-antibody-n-18?requestFrom=search">https://www.scbt.com/scbt/product/trap150-antibody-n-18?requestFrom=search</a>                                     |
| RBPJ                    | ACTIVE MOTIF        | 61074         | WB                           | 13611001          | <a href="https://www.activemotif.com/catalog/details/61073/rbpj-antibody-mab">https://www.activemotif.com/catalog/details/61073/rbpj-antibody-mab</a>                                                   |
| RBPJ (1F1)              | ACTIVE MOTIF        | 61505         | WB, EMSA-SUPERSHIFTING       | 31913001          | <a href="https://www.activemotif.com/catalog/details/61505/rbpj-antibody-mab-clone-1f1">https://www.activemotif.com/catalog/details/61505/rbpj-antibody-mab-clone-1f1</a>                               |
| RBPJ                    | ABCAM               | ab25949       | ChIP                         | GR220477-1        | <a href="http://www.abcam.com/rbpjk-antibody-chip-grade-ab25949.html">http://www.abcam.com/rbpjk-antibody-chip-grade-ab25949.html</a>                                                                   |
| TUBULIN                 | SIGMA               | T6074         | WB                           | 081M4861          | <a href="https://www.sigmaaldrich.com/catalog/product/sigma/t6074?lang=en&amp;region=US">https://www.sigmaaldrich.com/catalog/product/sigma/t6074?lang=en&amp;region=US</a>                             |
| RSRC2 (F-16)            | SANTA CRUZ          | sc-102100     | WB, ChIP                     |                   | <a href="https://www.scbt.com/scbt/search?Ntt=sc-102100">https://www.scbt.com/scbt/search?Ntt=sc-102100</a>                                                                                             |
| RSRC2                   | GENETEX             | GXT45867      | WB                           | 812504000         | <a href="http://www.genetex.com/RSRC2-antibody-C-term-GTX45867.html">http://www.genetex.com/RSRC2-antibody-C-term-GTX45867.html</a>                                                                     |
| HIST1H1C                | AVIVA               | arp46122_p050 | WB                           | QC16951           | <a href="https://www.avivasysbio.com/en/hist1h1c-antibody-middle-region-arp46122-p050.html">https://www.avivasysbio.com/en/hist1h1c-antibody-middle-region-arp46122-p050.html</a>                       |
| STAT4 (15A1B41)         | BIOLEGEND           | 660502        | WB                           |                   | <a href="https://www.biolegend.com/en-us/products/purified-anti-stat4-antibody-9803">https://www.biolegend.com/en-us/products/purified-anti-stat4-antibody-9803</a>                                     |
| SATB1 (C-6)             | SANTA CRUZ          | sc-376096     | WB                           | K2712             | <a href="https://www.scbt.com/scbt/product/satb1-antibody-c-6?requestFrom=search">https://www.scbt.com/scbt/product/satb1-antibody-c-6?requestFrom=search</a>                                           |
| SATB2 (SATBA4B10)       | SANTA CRUZ          | sc-81376      | WB                           | C1815             | <a href="https://www.scbt.com/scbt/product/satb2-antibody-satba4b10?requestFrom=search">https://www.scbt.com/scbt/product/satb2-antibody-satba4b10?requestFrom=search</a>                               |
| PE CD40                 | R&D                 | FAB6321P      | FACS                         | LRP0211071        | <a href="https://www.rndsystems.com/products/human-cd40-tnfrsf5-pe-conjugated-antibody-82111_fab6321p">https://www.rndsystems.com/products/human-cd40-tnfrsf5-pe-conjugated-antibody-82111_fab6321p</a> |
| PE IgG2B                | R&D                 | IC0041P       | FACS                         | LHG1108051        | <a href="https://www.rndsystems.com/products/mouse-igg2b-pe-conjugated-antibody_ic0041p">https://www.rndsystems.com/products/mouse-igg2b-pe-conjugated-antibody_ic0041p</a>                             |
